# Supplementary material for: Association between Obesity during Pregnancy and Increased Use of Health Care
Source: Atypon-hosted journal article supplement (doi:10.1056/nejmoa0706786), 2008-04-02
Supplement: nejm_chu_1444sa1.pdf [file nejm_chu_1444sa1.pdf]

## Supplementary Appendix

This appendix has been provided by the authors to give readers additional information about their work.

Supplement to: Chu SY, Bachman DJ, Callaghan WM, et al. Association between obesity during pregnancy and increased use of health care. *N Engl J Med* 2008;358:1444-53.

**Table 1. Characteristics of included and excluded pregnancy episodes**

| <b>Characteristic</b>       | <b>Included<br/>(N=13,442)<br/>n (%)</b> | <b>Excluded<br/>(N=6,096)<br/>n (%)</b> | <b>p-value</b> |
|-----------------------------|------------------------------------------|-----------------------------------------|----------------|
| <b>Age</b>                  |                                          |                                         |                |
| 18-24 yrs                   | 3811 (28.4)                              | 2386 (39.1)                             | p<0.001        |
| 25-29 yrs                   | 4242 (31.6)                              | 1786 (29.3)                             |                |
| 30-34 yrs                   | 3684 (27.4)                              | 1292 (21.2)                             |                |
| 35-39 yrs                   | 1429 (10.6)                              | 518 (8.5)                               |                |
| 40+ yrs                     | 276 (2.1)                                | 114 (1.9)                               |                |
| <b>Race/Ethnicity</b>       |                                          |                                         |                |
| White                       | 10108 (75.2)                             | 4318 (70.8)                             | p<0.001        |
| Black                       | 506 (3.8)                                | 245 (4.0)                               |                |
| Hispanic                    | 1255 (9.3)                               | 727 (11.9)                              |                |
| Asian                       | 1317 (9.8)                               | 554 (9.1)                               |                |
| Other                       | 177 (1.3)                                | 80 (1.3)                                |                |
| Data Missing                | 79 (0.6)                                 | 172 (2.8)                               |                |
| <b>Marital Status</b>       |                                          |                                         |                |
| Married/Separated           | 10734 (79.9)                             | 4190 (68.7)                             | p<0.001        |
| Single/Divorced/<br>Widowed | 2360 (17.6)                              | 1386 (22.7)                             |                |
| Unknown                     | 348 (2.6)                                | 520 (8.5)                               |                |
| <b>Education</b>            |                                          |                                         |                |
| <12 yrs                     | 902 (6.7)                                | 699 (11.5)                              | p<0.001        |
| 12 yrs                      | 3790 (28.2)                              | 1925 (31.6)                             |                |
| >12 yrs                     | 8033 (59.8)                              | 2748 (45.1)                             |                |
| Unknown                     | 717 (5.3)                                | 724 (11.9)                              |                |

| <b>Characteristic</b>                                                            | <b>Included<br/>(n=13,442)<br/>n (%)</b> | <b>Excluded<br/>(n=6,096)<br/>n (%)</b> | <b>p-value</b> |
|----------------------------------------------------------------------------------|------------------------------------------|-----------------------------------------|----------------|
| <b>Medicaid or Washington Basic Health Plan</b>                                  | 951 (7.1)                                | 971 (15.9)                              | p<0.001        |
| <b>Parity</b>                                                                    |                                          |                                         |                |
| 0                                                                                | 5546 (41.3)                              | 2326 (38.2)                             | p<0.001        |
| 1                                                                                | 4628 (34.4)                              | 1958 (32.1)                             |                |
| 2                                                                                | 2036 (15.2)                              | 970 (15.9)                              |                |
| ≥3                                                                               | 1165 (8.7)                               | 715 (11.7)                              |                |
| Data Missing                                                                     | 67 (0.5)                                 | 127 (2.1)                               |                |
| <b>Cesarean Delivery</b>                                                         | 3586 (26.7)                              | 1413 (23.2)                             | p<0.001        |
| <b>Pregnancy outcome</b>                                                         |                                          |                                         |                |
| Live infant                                                                      | 13355 (99.3)                             | 6045 (99.2)                             | NS             |
| Stillborn                                                                        | 87 (0.7)                                 | 51 (0.8)                                |                |
| <b>Gestational age &lt;37 wks at delivery</b>                                    | 1193 (8.9)                               | 546 (9.0)                               | NS             |
| <b>Diabetes mellitus excluding pregnancy, childbirth, puerperium<sup>a</sup></b> | 284 (2.1)                                | 92 (1.5)                                | p<0.01         |
| <b>Gestational diabetes mellitus<sup>b</sup></b>                                 | 703 (5.2)                                | 260 (4.3)                               | p<0.01         |
| <b>Hypertensive Disorders during pregnancy<sup>c</sup></b>                       | 1871 (13.9)                              | 721 (11.8)                              | p<0.001        |

| <b>Characteristic</b>                               | <b>Included (n=13,442)<br/>n (%)</b> | <b>Excluded<br/>(n=6,096)<br/>n (%)</b> | <b>p-value</b> |
|-----------------------------------------------------|--------------------------------------|-----------------------------------------|----------------|
| <b>Presence of a high-risk condition</b>            | 2635 (19.6)                          | 1006 (16.5)                             | p<0.001        |
| <b>Tobacco use during pregnancy<sup>d</sup></b>     |                                      |                                         |                |
| Yes                                                 | 2129 (15.8)                          | 1184 (19.4)                             | p<0.001        |
| No                                                  | 11204 (83.4)                         | 4720 (77.4)                             |                |
| Unknown                                             | 109 (0.8)                            | 192 (3.2)                               |                |
| <b>Alcohol or drug abuse/dependence<sup>e</sup></b> | 265 (2.0)                            | 183 (3.0)                               | p<0.001        |
| <b>Depression during pregnancy<sup>f</sup></b>      | 1146 (8.5)                           | 332 (5.5)                               | p<0.001        |
| <b>Prepregnancy weight<sup>g</sup></b>              |                                      |                                         |                |
| <100 lbs                                            | 166 (1.2)                            | 8 (1.3)                                 | NS             |
| 100-150 lbs                                         | 6471 (48.1)                          | 277 (45.4)                              |                |
| 150-200 lbs                                         | 4704 (35.0)                          | 232 (38.0)                              |                |
| 200-250 lbs                                         | 1558 (11.6)                          | 71 (11.6)                               |                |
| ≥ 250 lbs                                           | 543 (4.0)                            | 22 (3.6)                                |                |

a ICD-9-CM codes 250.0-250.9; 648.0; or indicated on the birth certificate

b ICD-9-CM code 648.8; or indicated on the birth certificate

c ICD-9-CM codes 401-405; 642; 760.0; or indicated on the birth certificate (Oregon only)

d Tobacco use any time during the pregnancy reported on KPNW database or on the birth certificate

e Alcohol or drug use during pregnancy reported on KPNW database or on the birth certificate

f ICD-9-CM codes 296.2; 296.20-296.25; 296.3, 296.30-296.82; 300.4; 309.1; 309.28; 311; or 648.4 with an antidepressant medication dispensed within 30 days of the diagnosis

g Among excluded, those with weights but missing heights only
